# Supplementary material for: Protein C Pretreatment Protects Endothelial Cells from SARS-CoV-2-Induced Activation
Source: Preprints.org preprint supplement (doi:10.20944/preprints202405.2133.v1), 2024-05-31
Supplement: Supplementary file 2 [file supplementary]

Archive with 1 entries (1 files):
- preprints-107983-supplementary.pdf
